# Supplementary material for: Bionic smart recycled paper endowed with amphiphobic, photochromic, and UV rewritable properties
Source: Royal Society of Chemistry journal article supplement (doi:10.1039/d0na00627k), 2020-01-01
Supplement: d0na00627k1.pdf [file d0na00627k1.pdf]

## Supplementary Information

### **Bionic smart recycled paper endowed with amphiphobic, photochromic, repeatedly UV writable utility**

Guofeng Zhang,<sup>a</sup> Guopeng Chen<sup>a</sup>, Fuchao Yang<sup>a\*</sup> and Zhiguang Guo<sup>\*ab</sup>

<sup>a</sup>Hubei Collaborative Innovation Centre for Advanced Organic Chemical Materials and Ministry of Education Key Laboratory for the Green Preparation and Application of Functional Materials, Hubei University, Wuhan 430062, People's Republic of China.

<sup>b</sup>State Key Laboratory of Solid Lubrication, Lanzhou Institute of Chemical Physics, Chinese Academy of Sciences, Lanzhou 730000, People's Republic of China.

\*Corresponding author. Email: Yang's Email: [yfc@hubu.edu.cn](mailto:yfc@hubu.edu.cn); Guo's Email: [zguo@licp.cas.cn](mailto:zguo@licp.cas.cn).

## Supplementary Figures

**Figure S1.** (a-b) FESEM images of *Chenopodium album* L. leaves.

**Figure S2.** (a) PAR<sub>1-7</sub> (long ~ 4.5 cm, width ~ 1.5cm) (b) The tweezers clamped PAR<sub>1-7</sub> and ignited in the flame lasting for 3 s, then moved away from the embers that allowed it to burn naturally in the air.

**Figure S3.** EDS (a) and element mapping (b) of PAR<sub>1</sub>. (c) Element mapping of C, O, Ca, Na, and Mg in PAR<sub>7</sub>.

**Figure S4.** Thermogravimetry curves of PAR<sub>1</sub> and PAR<sub>7</sub> samples.

**Figure S5** (a) The illustration for mechanical wear test. The WCA (b) and OCA (c) of PAR<sub>7</sub> after different wear length. The PAR<sub>7</sub> surface of was loaded with 294 N (normal direction) and then grind it horizontally with sandpaper (1500 meshes).

**Figure S6.** The OCA of soybean oil (a), motorcycle oil (b), and arowana oil (c) on the surface of PAR<sub>7</sub>.

**Figure S7.** Homemade simple mold: (a) I♥-shape; (b) 70-shape; (c) SLJ-shape.

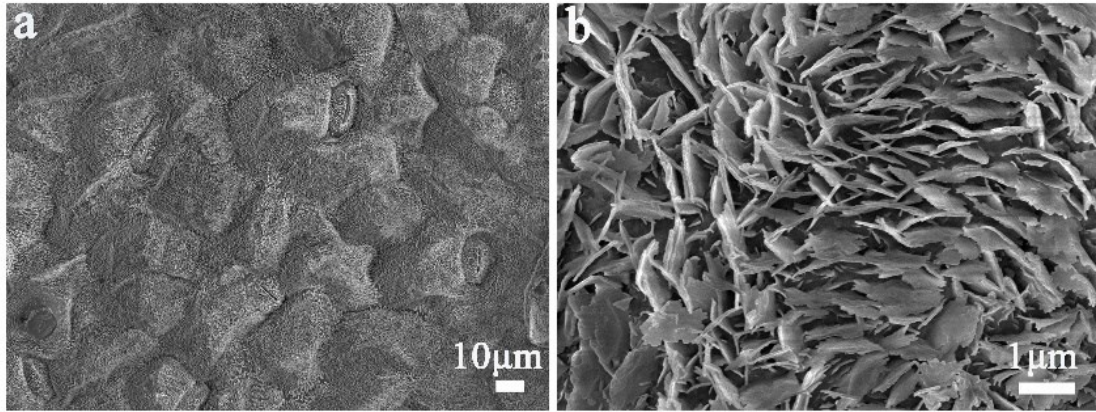

**Figure S1** (a-b) FESEM images of *Chenopodium album* L. leaves.

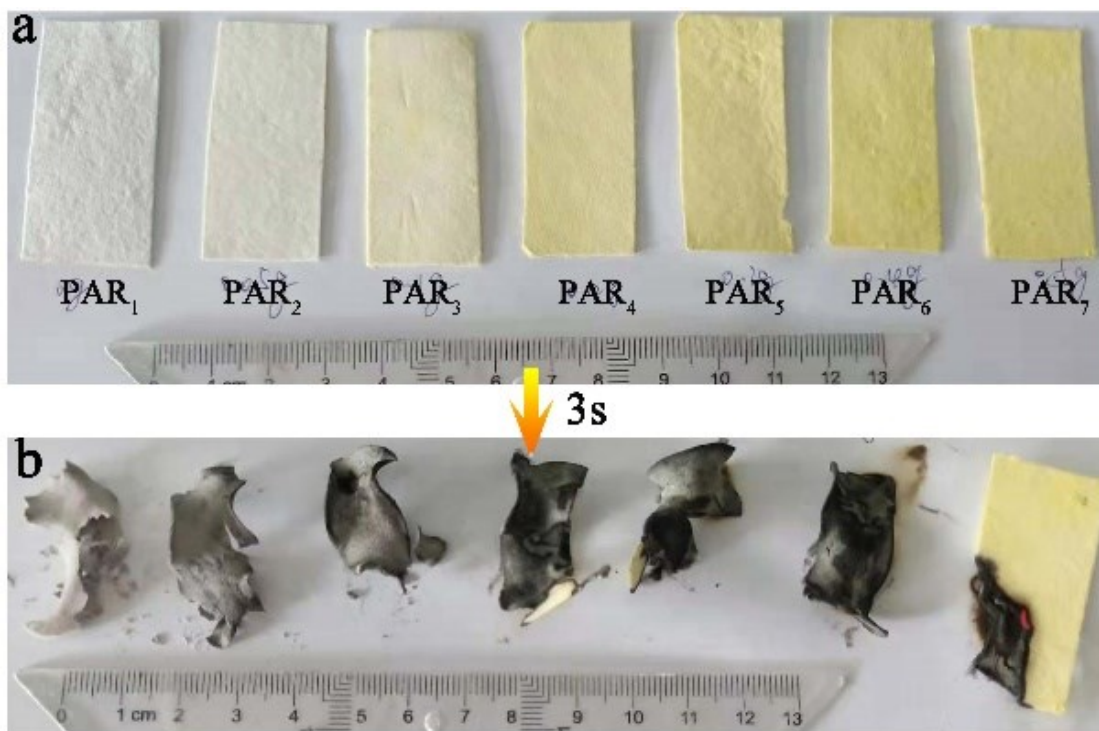

**Figure S2** (a) PAR<sub>1-7</sub> (long ~ 4.5 cm, width ~ 1.5cm) (b) The tweezers clamped PAR<sub>1-7</sub> and ignited in the flame of the flame for 3 s, then moved away from the embers that allowed it to burn naturally in the air.

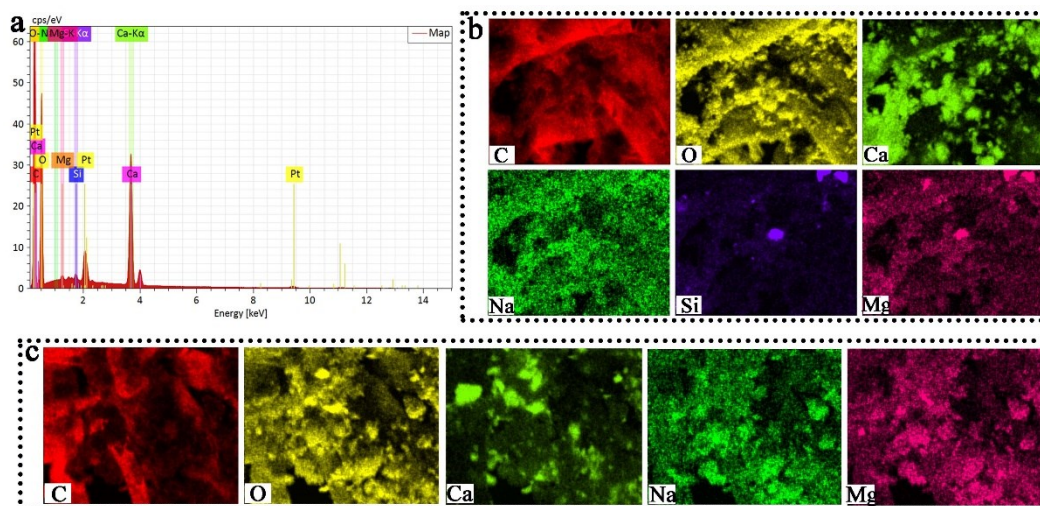

**Figure S3** EDS (a) and element mapping (b) of PAR<sub>1</sub>. (c) Element mapping of C, O, Ca, Na, and Mg in PAR<sub>7</sub>.

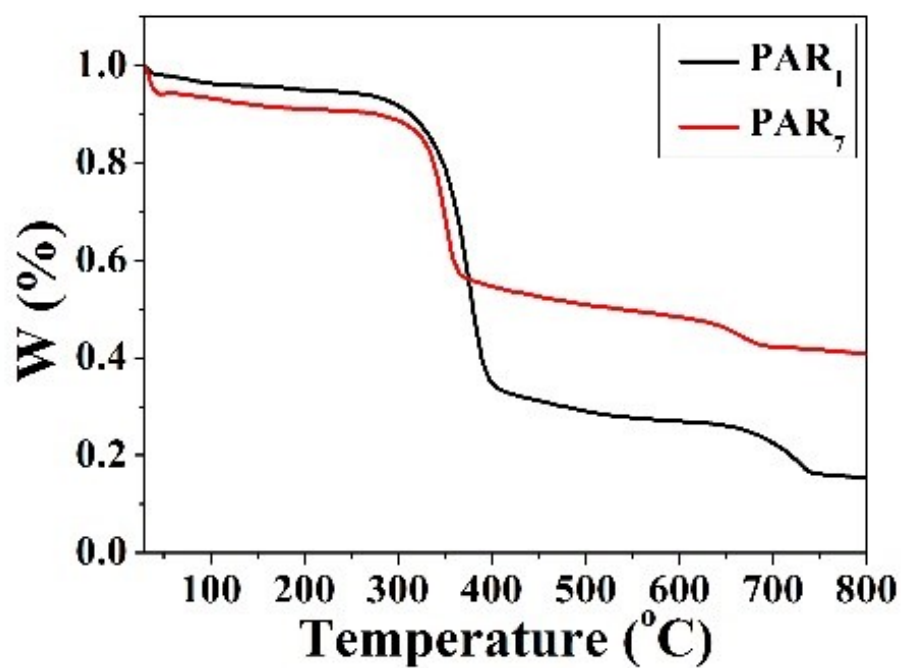

**Figure S4** Thermogravimetry curves of PAR<sub>1</sub> and PAR<sub>7</sub> samples.

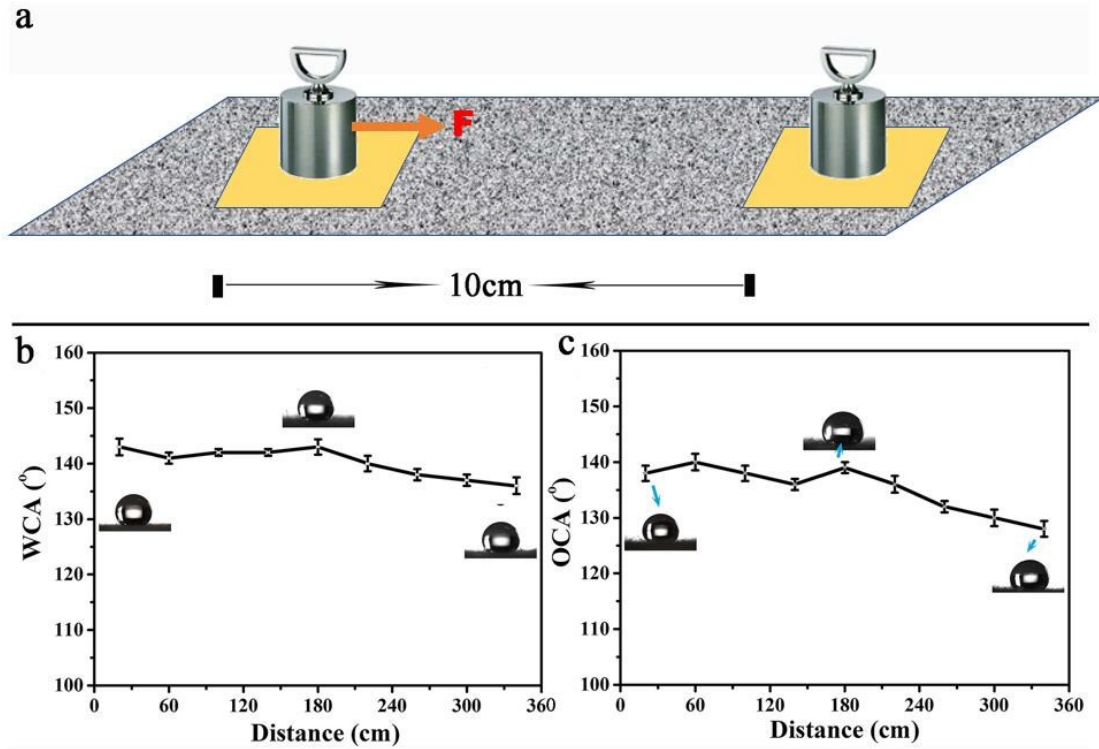

**Figure S5** (a) The illustration for mechanical wear test. The WCA (b) and OCA (c) of PAR<sub>7</sub> after different wear length. The PAR<sub>7</sub> surface of was loaded with 294 N (normal direction) and then grind it horizontally with sandpaper (1500 meshes).

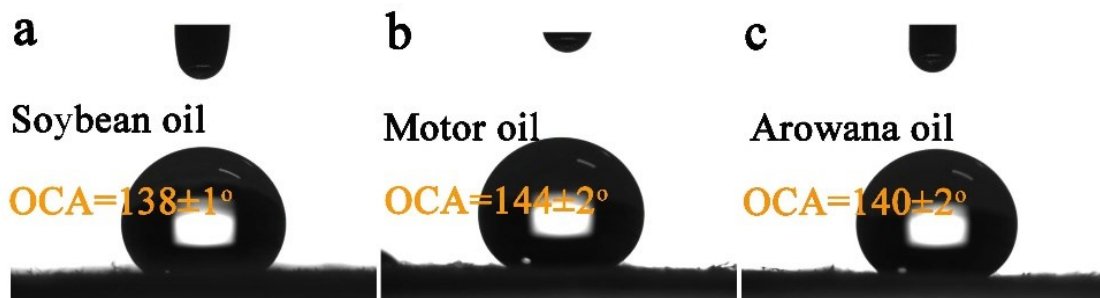

**Figure S6** The OCA of soybean oil (a), motorcycle oil (b), and arowana oil (c) on the surface of PAR<sub>7</sub>.

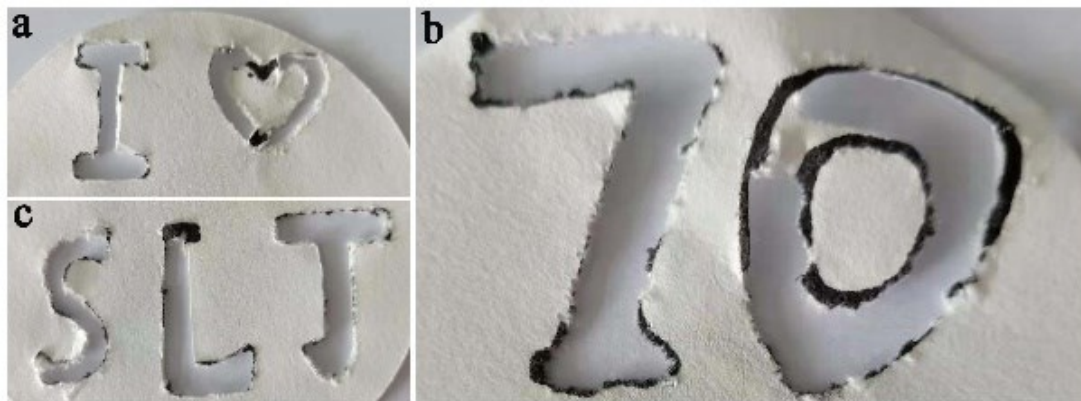

**Figure S7** Homemade simple mold: (a) I♥-shape; (b) 70-shape; (c) SLJ-shape.
